# Supplementary material
Source: PubMed Central journal article supplement (PMC3778357)
Supplement: ejhg20131x1.pdf [file ejhg20131x1.pdf]

**Supplemental Table 1a. Expression of genes located in 15q13.3 assessed by microarray**

| Transcript Cluster ID | Gene Symbol   | RefSeq    | Proband (double deletion) |             |          | Unaffected brother |             |          | Control boys (n=3) |          |          |
|-----------------------|---------------|-----------|---------------------------|-------------|----------|--------------------|-------------|----------|--------------------|----------|----------|
|                       |               |           | p-value                   | Fold-Change | Raw data | p-value            | Fold-Change | Raw data | Raw data           | Raw data | Raw data |
| 3586834               | <b>MTMR15</b> | NM_014967 | 0.07                      | -1.55       | 31.10    | 0.81               | 1.03        | 88.79    | 96.11              | 70.71    | 87.24    |
| 3587015               | <b>KLF13</b>  | NM_015995 | 0.03                      | -1.74       | 130.89   | 0.32               | 1.13        | 780.57   | 722.93             | 575.60   | 693.16   |
| 3587226               | <b>CHRNA7</b> | NM_000746 | 0.61                      | -1.04       | 121.88   | 0.18               | 1.15        | 156.68   | 116.76             | 137.54   | 134.98   |
| 3615985               | <b>MTMR10</b> | NM_017762 | 0.00                      | -1.75       | 44.12    | 0.19               | -1.05       | 215.50   | 242.14             | 227.50   | 229.73   |
| 3616044               | <b>TRPM1</b>  | NM_002420 | 0.45                      | 1.05        | 40.50    | 0.13               | 1.15        | 45.21    | 39.31              | 39.09    | 34.59    |
| 3616216               | <b>OTUD7A</b> | NM_130901 | 0.76                      | -1.02       | 109.47   | 0.73               | 1.02        | 115.82   | 105.64             | 120.16   | 111.64   |

| Mother  |             |          | Grandmother |             |          | Control females (n=3) |          |          |
|---------|-------------|----------|-------------|-------------|----------|-----------------------|----------|----------|
| p-value | Fold-Change | Raw data | p-value     | Fold-Change | Raw data | Raw data              | Raw data | Raw data |
| 0.25    | -1.53       | 54.79    | 0.31        | -1.44       | 67.15    | 86.66                 | 165.16   | 169.28   |
| 0.22    | -1.32       | 517.21   | 0.26        | -1.27       | 562.56   | 689.39                | 873.70   | 1029.51  |
| 0.47    | -1.07       | 150.23   | 0.45        | -1.07       | 149.38   | 154.71                | 182.39   | 158.87   |
| 0.31    | -1.20       | 136.79   | 0.17        | -1.33       | 109.51   | 218.16                | 154.11   | 186.12   |
| 0.77    | 1.02        | 37.96    | 0.50        | 1.05        | 39.45    | 38.92                 | 37.99    | 33.85    |
| 0.32    | -1.09       | 108.32   | 0.57        | -1.05       | 115.73   | 124.45                | 113.12   | 133.28   |

| Father  |             |          | Uncle   |             |          | Control males (n=3) |          |          |
|---------|-------------|----------|---------|-------------|----------|---------------------|----------|----------|
| p-value | Fold-Change | Raw data | p-value | Fold-Change | Raw data | Raw data            | Raw data | Raw data |
| 0.22    | -1.48       | 50.81    | 0.65    | -1.13       | 97.50    | 79.77               | 139.48   | 133.44   |
| 0.10    | -1.37       | 475.49   | 0.03    | -1.76       | 159.98   | 738.71              | 951.06   | 922.26   |
| 0.56    | -1.05       | 141.88   | 0.05    | 1.35        | 219.99   | 137.89              | 155.68   | 165.84   |
| 0.62    | -1.18       | 140.61   | 0.50    | -1.27       | 121.51   | 260.15              | 133.90   | 160.84   |
| 0.69    | -1.02       | 42.62    | 0.01    | 1.61        | 74.06    | 42.48               | 46.36    | 42.58    |
| 0.37    | -1.22       | 95.68    | 0.54    | 1.14        | 160.36   | 101.20              | 158.82   | 145.23   |

**Supplemental Table 1b. Expression of TRPM1 and CHRNA7 assessed by QRT-PCR**

|                 | TRPM1          |                    | CHRNA7         |                     |
|-----------------|----------------|--------------------|----------------|---------------------|
|                 | C <sub>T</sub> | fold change        | C <sub>T</sub> | fold change         |
| Proband         | undetectable   |                    | undetectable   |                     |
| Control boys    | 35.40          |                    | 37.91          |                     |
| Mother          | 37.30          | -5.60 <sup>1</sup> | 38.68          | -2.30 <sup>1</sup>  |
| Control females | 34.51          |                    | 37.53          |                     |
| Father          | 36.60          | -4.56 <sup>2</sup> | 39.49          | -4.08 <sup>2</sup>  |
| Control males   | 34.32          |                    | 37.45          |                     |
| Brain RNA       | 33.08          | +3.33 <sup>3</sup> | 32.39          | +10.48 <sup>3</sup> |

- 1 fold change relative to comparison females
- 2 fold change relative to comparison males
- 3 fold change relative to average of all controls
