# Supplementary material
Source: PubMed Central journal article supplement (PMC3778357)
Supplement: ejhg20131x2.pdf [file ejhg20131x2.pdf]

Supplemental Table 2. 267 genes with changed expression in the proband relative to comparison subjects

Table with 17 columns: Affymetrix Transcript ID, Gene Symbol, RefSeq, gene name, gene location, p-value, Fold-Change, p-value, Fold-Change, p-value, Fold-Change, p-value, Fold-Change, p-value, Fold-Change, p-value, Fold-Change. Rows list 267 genes such as ALKBH7, APOA2, APOA5, APOE, APOH, APOJ, APOK1, APOK2, APOK3, APOK4, APOK5, APOK6, APOK7, APOK8, APOK9, APOK10, APOK11, APOK12, APOK13, APOK14, APOK15, APOK16, APOK17, APOK18, APOK19, APOK20, APOK21, APOK22, APOK23, APOK24, APOK25, APOK26, APOK27, APOK28, APOK29, APOK30, APOK31, APOK32, APOK33, APOK34, APOK35, APOK36, APOK37, APOK38, APOK39, APOK40, APOK41, APOK42, APOK43, APOK44, APOK45, APOK46, APOK47, APOK48, APOK49, APOK50, APOK51, APOK52, APOK53, APOK54, APOK55, APOK56, APOK57, APOK58, APOK59, APOK60, APOK61, APOK62, APOK63, APOK64, APOK65, APOK66, APOK67, APOK68, APOK69, APOK70, APOK71, APOK72, APOK73, APOK74, APOK75, APOK76, APOK77, APOK78, APOK79, APOK80, APOK81, APOK82, APOK83, APOK84, APOK85, APOK86, APOK87, APOK88, APOK89, APOK90, APOK91, APOK92, APOK93, APOK94, APOK95, APOK96, APOK97, APOK98, APOK99, APOK100.
