# Supplementary material
Source: PubMed Central journal article supplement (PMC3778357)
Supplement: ejhg20131x3.pdf [file ejhg20131x3.pdf]

Legend

Description Legend

This legend provides a key of the main features of Network Explorer and Canonical Pathways, including molecule shapes and colors as well as relationship labels and types.

Molecule Shapes

| Network Shapes                                                                                                        | Path Designer Shapes                                                                                                  |
|-----------------------------------------------------------------------------------------------------------------------|-----------------------------------------------------------------------------------------------------------------------|
|  Cytokine                            |  Cytokine / Growth Factor            |
|  Growth Factor                       |  Drug                                |
|  Chemical / Drug / Toxicant          |  Chemical / Toxicant                 |
|  Enzyme                              |  Enzyme                              |
|  G-protein Coupled Receptor          |  G-protein Coupled Receptor          |
|  Ion Channel                         |  Ion Channel                         |
|  Kinase                             |  Kinase                             |
|  Ligand-dependent Nuclear Receptor |  Ligand-dependent Nuclear Receptor |
|  Peptidase                         |  Peptidase                         |
|  Phosphatase                       |  Phosphatase                       |
|  Transcription Regulator           |  Transcription Regulator           |
|  Translation Regulator             |  Translation Regulator             |
|  Transmembrane Receptor            |  Transmembrane Receptor            |
|  Transporter                       |  Transporter                       |
|  Complex / Group                   |  microRNA                          |
|  microRNA                          |  Mature microRNA                   |
|  Mature microRNA                   |  Complex / Group / Other           |
|  Other                             |                                                                                                                       |

Relationship Types

**Relationship Labels**

|             |                                                                  |
|-------------|------------------------------------------------------------------|
| <b>A</b>    | <b>Activation</b>                                                |
| <b>B</b>    | <b>Binding</b>                                                   |
| <b>C</b>    | <b>Causes/Leads to</b>                                           |
| <b>CC</b>   | <b>Chemical-Chemical interaction</b>                             |
| <b>CP</b>   | <b>Chemical-Protein interaction</b>                              |
| <b>E</b>    | <b>Expression (includes metabolism/ synthesis for chemicals)</b> |
| <b>EC</b>   | <b>Enzyme Catalysis</b>                                          |
| <b>I</b>    | <b>Inhibition</b>                                                |
| <b>L</b>    | <b>Proteolysis (includes degradation for Chemicals)</b>          |
| <b>LO</b>   | <b>Localization</b>                                              |
| <b>M</b>    | <b>Biochemical Modification</b>                                  |
| <b>miT</b>  | <b>microRNA Targeting</b>                                        |
| <b>MB</b>   | <b>Group/complex Membership</b>                                  |
| <b>nTRR</b> | <b>Non-Targeting RNA-RNA Interaction</b>                         |
| <b>P</b>    | <b>Phosphorylation/Dephosphorylation</b>                         |
| <b>PD</b>   | <b>Protein-DNA binding</b>                                       |
| <b>PP</b>   | <b>Protein-Protein binding</b>                                   |
| <b>PR</b>   | <b>Protein-RNA binding</b>                                       |
| <b>PY</b>   | <b>Processing Yields</b>                                         |
| <b>RB</b>   | <b>Regulation of Binding</b>                                     |
| <b>RE</b>   | <b>Reaction</b>                                                  |
| <b>RR</b>   | <b>RNA-RNA Binding</b>                                           |
| <b>T</b>    | <b>Transcription</b>                                             |
| <b>TR</b>   | <b>Translocation</b>                                             |

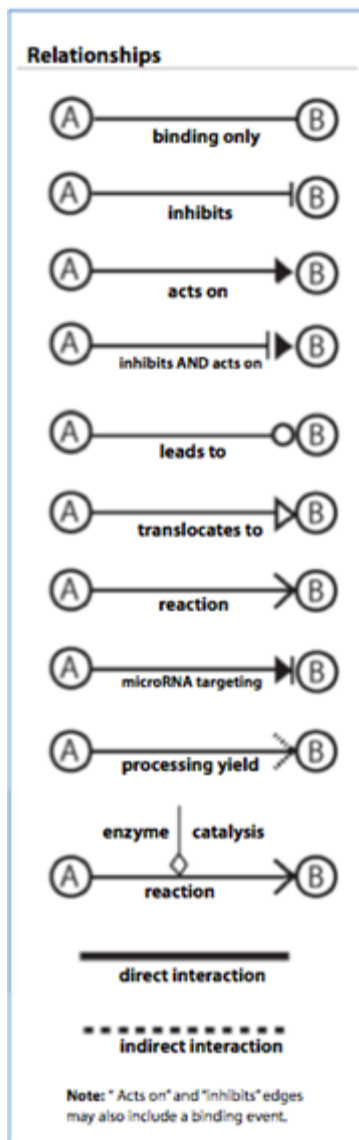

A relationship with an X over it indicates that the interaction does not occur. These relationships are only used in Disease pathways to indicate an interaction that would normally happen in the absence of the disease, but does not happen in the disease context.

An arrow pointing from A to B signifies different actions for different circumstances, as described below:

#### For signaling pathways:

An arrow pointing from A to B signifies that A causes B to be activated (includes any direct interaction: e.g. binding, phosphorylation, dephosphorylation, etc).

#### For metabolic pathways:

An arrow pointing from A to B signifies that B is produced from A.
